# Supplementary material for: The land use, trade, and global food security impacts of an agroecological transition in the EU
Source: Frontiers journal article supplement (doi:10.3389/fsufs.2023.1189952), 2023-08-24
Supplement: Table_2.XLSX [file Table_2.XLSX]

## Sheet: readme
sheet	LAND
	index	description
	s	scenario
	r	region
	i	item
	land_use	cultivated area [1000 ha]
sheet	PROD_CAL
	index	description
	s	scenario
	v	variable (animal products/vegetal products)
	r	region
	r2	region2 (EU/rest of the world)
	Prod_cal	production of calories [giga calories]
sheet	IMP_EXP_CAL
	index	description
	s	scenario
	v	variable (animal products/vegetal products)
	t	variable (import/export)
	r	region
	r2	region2 (EU/rest of the world)
	Trade_Cal	import/export of calories [giga calories]
sheet	DEP
	index	description
	s	scenario
	r	region
	Depnet	net dependence [%]
sheet	DIET
	i	products eaten by EU population (in crop equivalent)
	Initial diet UE 27 [kcal/cap/day] (waste included)
	Reference diet UE 27 [kcal/cap/day] (waste included)
	TYFA diet [kcal/cap/day] (waste included)

## Sheet: LAND
s	r	i2	land_use
Initial	Brazil, Argentina	Fruits and vegetables	4180.78
Reference	Brazil, Argentina	Fruits and vegetables	4231.72
TOGETHER	Brazil, Argentina	Fruits and vegetables	8382.62
TYFA-EU	Brazil, Argentina	Fruits and vegetables	4171.13
TYFA-EU-SUPPLY	Brazil, Argentina	Fruits and vegetables	4677.91
Initial	Brazil, Argentina	Grass	303700
Reference	Brazil, Argentina	Grass	248787
TOGETHER	Brazil, Argentina	Grass	291468
TYFA-EU	Brazil, Argentina	Grass	246349
TYFA-EU-SUPPLY	Brazil, Argentina	Grass	248594
Initial	Brazil, Argentina	Maize, Rice and Wheat	31028.2
Reference	Brazil, Argentina	Maize, Rice and Wheat	31665.9
TOGETHER	Brazil, Argentina	Maize, Rice and Wheat	27129.7
TYFA-EU	Brazil, Argentina	Maize, Rice and Wheat	31462.1
TYFA-EU-SUPPLY	Brazil, Argentina	Maize, Rice and Wheat	33553.6
Initial	Brazil, Argentina	Oilcrops	3912.86
Reference	Brazil, Argentina	Oilcrops	4892.08
TOGETHER	Brazil, Argentina	Oilcrops	2919.76
TYFA-EU	Brazil, Argentina	Oilcrops	4641.26
TYFA-EU-SUPPLY	Brazil, Argentina	Oilcrops	6556.65
Initial	Brazil, Argentina	Other	9858.66
Reference	Brazil, Argentina	Other	11354.7
TOGETHER	Brazil, Argentina	Other	6887.47
TYFA-EU	Brazil, Argentina	Other	11259.1
TYFA-EU-SUPPLY	Brazil, Argentina	Other	12050.7
Initial	Brazil, Argentina	Other cereals	2798.67
Reference	Brazil, Argentina	Other cereals	3345.97
TOGETHER	Brazil, Argentina	Other cereals	5420.71
TYFA-EU	Brazil, Argentina	Other cereals	3272.92
TYFA-EU-SUPPLY	Brazil, Argentina	Other cereals	4286.65
Initial	Brazil, Argentina	Other forages	2778.79
Reference	Brazil, Argentina	Other forages	2641.7
TOGETHER	Brazil, Argentina	Other forages	2638.53
TYFA-EU	Brazil, Argentina	Other forages	2616.68
TYFA-EU-SUPPLY	Brazil, Argentina	Other forages	2657.21
Initial	Brazil, Argentina	Pulses	4962.19
Reference	Brazil, Argentina	Pulses	1823.68
TOGETHER	Brazil, Argentina	Pulses	1384.25
TYFA-EU	Brazil, Argentina	Pulses	1931.46
TYFA-EU-SUPPLY	Brazil, Argentina	Pulses	2178.38
Initial	Brazil, Argentina	Soyabeans	43841
Reference	Brazil, Argentina	Soyabeans	64129.5
TOGETHER	Brazil, Argentina	Soyabeans	26465.5
TYFA-EU	Brazil, Argentina	Soyabeans	50613
TYFA-EU-SUPPLY	Brazil, Argentina	Soyabeans	52378.7
Initial	Brazil, Argentina	Sugar plants and products	9671.93
Reference	Brazil, Argentina	Sugar plants and products	7038
TOGETHER	Brazil, Argentina	Sugar plants and products	7197.18
TYFA-EU	Brazil, Argentina	Sugar plants and products	6952.15
TYFA-EU-SUPPLY	Brazil, Argentina	Sugar plants and products	7616.13
Initial	Canada, USA	Fruits and vegetables	3263.67
Reference	Canada, USA	Fruits and vegetables	3935.67
TOGETHER	Canada, USA	Fruits and vegetables	11369.1
TYFA-EU	Canada, USA	Fruits and vegetables	3907.8
TYFA-EU-SUPPLY	Canada, USA	Fruits and vegetables	4138.36
Initial	Canada, USA	Grass	264038
Reference	Canada, USA	Grass	248970
TOGETHER	Canada, USA	Grass	213287
TYFA-EU	Canada, USA	Grass	248119
TYFA-EU-SUPPLY	Canada, USA	Grass	249473
Initial	Canada, USA	Maize, Rice and Wheat	85826
Reference	Canada, USA	Maize, Rice and Wheat	118786
TOGETHER	Canada, USA	Maize, Rice and Wheat	132160
TYFA-EU	Canada, USA	Maize, Rice and Wheat	118058
TYFA-EU-SUPPLY	Canada, USA	Maize, Rice and Wheat	128688
Initial	Canada, USA	Oilcrops	12121.2
Reference	Canada, USA	Oilcrops	16343.4
TOGETHER	Canada, USA	Oilcrops	11200.7
TYFA-EU	Canada, USA	Oilcrops	14840
TYFA-EU-SUPPLY	Canada, USA	Oilcrops	16889.4
Initial	Canada, USA	Other	6189.16
Reference	Canada, USA	Other	10120.1
TOGETHER	Canada, USA	Other	6927.31
TYFA-EU	Canada, USA	Other	10586.9
TYFA-EU-SUPPLY	Canada, USA	Other	11810
Initial	Canada, USA	Other cereals	13321.9
Reference	Canada, USA	Other cereals	16218.6
TOGETHER	Canada, USA	Other cereals	33322.5
TYFA-EU	Canada, USA	Other cereals	16263.6
TYFA-EU-SUPPLY	Canada, USA	Other cereals	21536.2
Initial	Canada, USA	Other forages	46692.1
Reference	Canada, USA	Other forages	55353.5
TOGETHER	Canada, USA	Other forages	48761.4
TYFA-EU	Canada, USA	Other forages	54995.2
TYFA-EU-SUPPLY	Canada, USA	Other forages	55845.2
Initial	Canada, USA	Pulses	4656.17
Reference	Canada, USA	Pulses	6499.34
TOGETHER	Canada, USA	Pulses	24279.3
TYFA-EU	Canada, USA	Pulses	7782.94
TYFA-EU-SUPPLY	Canada, USA	Pulses	10742.1
Initial	Canada, USA	Soyabeans	39393.9
Reference	Canada, USA	Soyabeans	51655.6
TOGETHER	Canada, USA	Soyabeans	40647.6
TYFA-EU	Canada, USA	Soyabeans	45937.1
TYFA-EU-SUPPLY	Canada, USA	Soyabeans	46967.5
Initial	Canada, USA	Sugar plants and products	1070.45
Reference	Canada, USA	Sugar plants and products	1494.33
TOGETHER	Canada, USA	Sugar plants and products	777.037
TYFA-EU	Canada, USA	Sugar plants and products	1478.25
TYFA-EU-SUPPLY	Canada, USA	Sugar plants and products	1579.97
Initial	China	Fruits and vegetables	24054.6
Reference	China	Fruits and vegetables	15882.2
TOGETHER	China	Fruits and vegetables	21126.7
TYFA-EU	China	Fruits and vegetables	15840.9
TYFA-EU-SUPPLY	China	Fruits and vegetables	16207.8
Initial	China	Grass	392834
Reference	China	Grass	312339
TOGETHER	China	Grass	300492
TYFA-EU	China	Grass	311845
TYFA-EU-SUPPLY	China	Grass	312381
Initial	China	Maize, Rice and Wheat	60267.8
Reference	China	Maize, Rice and Wheat	43257.1
TOGETHER	China	Maize, Rice and Wheat	42457.8
TYFA-EU	China	Maize, Rice and Wheat	43232.4
TYFA-EU-SUPPLY	China	Maize, Rice and Wheat	43579.8
Initial	China	Oilcrops	9558.22
Reference	China	Oilcrops	5619.8
TOGETHER	China	Oilcrops	4710.11
TYFA-EU	China	Oilcrops	5549.84
TYFA-EU-SUPPLY	China	Oilcrops	5902.72
Initial	China	Other	13344.4
Reference	China	Other	15137.1
TOGETHER	China	Other	11405.6
TYFA-EU	China	Other	15113.4
TYFA-EU-SUPPLY	China	Other	15358.1
Initial	China	Other cereals	2521.02
Reference	China	Other cereals	1368.59
TOGETHER	China	Other cereals	11773.3
TYFA-EU	China	Other cereals	1362.53
TYFA-EU-SUPPLY	China	Other cereals	1707.67
Initial	China	Other forages	2827.59
Reference	China	Other forages	2433.44
TOGETHER	China	Other forages	2616.22
TYFA-EU	China	Other forages	2427.14
TYFA-EU-SUPPLY	China	Other forages	2441.31
Initial	China	Pulses	2117.09
Reference	China	Pulses	1915.18
TOGETHER	China	Pulses	1771.99
TYFA-EU	China	Pulses	2087.4
TYFA-EU-SUPPLY	China	Pulses	2482.31
Initial	China	Soyabeans	6506.1
Reference	China	Soyabeans	3878.56
TOGETHER	China	Soyabeans	4622.79
TYFA-EU	China	Soyabeans	3808.38
TYFA-EU-SUPPLY	China	Soyabeans	3835.42
Initial	China	Sugar plants and products	1371.49
Reference	China	Sugar plants and products	2709.73
TOGETHER	China	Sugar plants and products	1153.08
TYFA-EU	China	Sugar plants and products	2699.98
TYFA-EU-SUPPLY	China	Sugar plants and products	2777.07
Initial	ECS Africa	Fruits and vegetables	9876.51
Reference	ECS Africa	Fruits and vegetables	12500.6
TOGETHER	ECS Africa	Fruits and vegetables	23599.2
TYFA-EU	ECS Africa	Fruits and vegetables	12478.7
TYFA-EU-SUPPLY	ECS Africa	Fruits and vegetables	12661.5
Initial	ECS Africa	Grass	656705
Reference	ECS Africa	Grass	768110
TOGETHER	ECS Africa	Grass	1.12853e+06
TYFA-EU	ECS Africa	Grass	768003
TYFA-EU-SUPPLY	ECS Africa	Grass	768152
Initial	ECS Africa	Maize, Rice and Wheat	33133.9
Reference	ECS Africa	Maize, Rice and Wheat	41484
TOGETHER	ECS Africa	Maize, Rice and Wheat	32062.8
TYFA-EU	ECS Africa	Maize, Rice and Wheat	41482.2
TYFA-EU-SUPPLY	ECS Africa	Maize, Rice and Wheat	41493.5
Initial	ECS Africa	Oilcrops	13676.7
Reference	ECS Africa	Oilcrops	21287.1
TOGETHER	ECS Africa	Oilcrops	15161.1
TYFA-EU	ECS Africa	Oilcrops	21203.2
TYFA-EU-SUPPLY	ECS Africa	Oilcrops	21334.9
Initial	ECS Africa	Other	21112.8
Reference	ECS Africa	Other	30441.1
TOGETHER	ECS Africa	Other	19886
TYFA-EU	ECS Africa	Other	30545.1
TYFA-EU-SUPPLY	ECS Africa	Other	31160.9
Initial	ECS Africa	Other cereals	30319.8
Reference	ECS Africa	Other cereals	11113.2
TOGETHER	ECS Africa	Other cereals	15344.6
TYFA-EU	ECS Africa	Other cereals	11112.8
TYFA-EU-SUPPLY	ECS Africa	Other cereals	11122.8
Initial	ECS Africa	Other forages	4622.75
Reference	ECS Africa	Other forages	4434.26
TOGETHER	ECS Africa	Other forages	4154.36
TYFA-EU	ECS Africa	Other forages	4433.93
TYFA-EU-SUPPLY	ECS Africa	Other forages	4434.16
Initial	ECS Africa	Pulses	12538.6
Reference	ECS Africa	Pulses	4454.94
TOGETHER	ECS Africa	Pulses	15413.9
TYFA-EU	ECS Africa	Pulses	4526.66
TYFA-EU-SUPPLY	ECS Africa	Pulses	4691.02
Initial	ECS Africa	Soyabeans	838.156
Reference	ECS Africa	Soyabeans	1979.3
TOGETHER	ECS Africa	Soyabeans	1487.27
TYFA-EU	ECS Africa	Soyabeans	1973.23
TYFA-EU-SUPPLY	ECS Africa	Soyabeans	1973.69
Initial	ECS Africa	Sugar plants and products	1432.79
Reference	ECS Africa	Sugar plants and products	1709.66
TOGETHER	ECS Africa	Sugar plants and products	1056.55
TYFA-EU	ECS Africa	Sugar plants and products	1702.42
TYFA-EU-SUPPLY	ECS Africa	Sugar plants and products	1758.73
Initial	EU-27	Fruits and vegetables	9203.03
Reference	EU-27	Fruits and vegetables	6869.63
TOGETHER	EU-27	Fruits and vegetables	10247.2
TYFA-EU	EU-27	Fruits and vegetables	8313.52
TYFA-EU-SUPPLY	EU-27	Fruits and vegetables	6305.96
Initial	EU-27	Grass	68261.1
Reference	EU-27	Grass	58753.4
TOGETHER	EU-27	Grass	57864.7
TYFA-EU	EU-27	Grass	58851.9
TYFA-EU-SUPPLY	EU-27	Grass	75479.4
Initial	EU-27	Maize, Rice and Wheat	36690.2
Reference	EU-27	Maize, Rice and Wheat	34337.6
TOGETHER	EU-27	Maize, Rice and Wheat	26051.8
TYFA-EU	EU-27	Maize, Rice and Wheat	30629.8
TYFA-EU-SUPPLY	EU-27	Maize, Rice and Wheat	32745.7
Initial	EU-27	Oilcrops	16212
Reference	EU-27	Oilcrops	14654.6
TOGETHER	EU-27	Oilcrops	5778.56
TYFA-EU	EU-27	Oilcrops	6958.02
TYFA-EU-SUPPLY	EU-27	Oilcrops	5574.85
Initial	EU-27	Other	4029.9
Reference	EU-27	Other	5573.05
TOGETHER	EU-27	Other	2769.07
TYFA-EU	EU-27	Other	4229.49
TYFA-EU-SUPPLY	EU-27	Other	1178.63
Initial	EU-27	Other cereals	25851.2
Reference	EU-27	Other cereals	26741.8
TOGETHER	EU-27	Other cereals	33341.8
TYFA-EU	EU-27	Other cereals	27700.4
TYFA-EU-SUPPLY	EU-27	Other cereals	16326.9
Initial	EU-27	Other forages	25601.4
Reference	EU-27	Other forages	25117.1
TOGETHER	EU-27	Other forages	23293.1
TYFA-EU	EU-27	Other forages	24242.8
TYFA-EU-SUPPLY	EU-27	Other forages	35104.4
Initial	EU-27	Pulses	1333.06
Reference	EU-27	Pulses	1184.42
TOGETHER	EU-27	Pulses	8886.63
TYFA-EU	EU-27	Pulses	8241.68
TYFA-EU-SUPPLY	EU-27	Pulses	3994.26
Initial	EU-27	Soyabeans	313.146
Reference	EU-27	Soyabeans	284.164
TOGETHER	EU-27	Soyabeans	4634.21
TYFA-EU	EU-27	Soyabeans	5558.07
TYFA-EU-SUPPLY	EU-27	Soyabeans	7674.16
Initial	EU-27	Sugar plants and products	1745.82
Reference	EU-27	Sugar plants and products	2520.59
TOGETHER	EU-27	Sugar plants and products	1245.15
TYFA-EU	EU-27	Sugar plants and products	1757.83
TYFA-EU-SUPPLY	EU-27	Sugar plants and products	30.8492
Initial	Former Soviet Union	Fruits and vegetables	4717.29
Reference	Former Soviet Union	Fruits and vegetables	3328.97
TOGETHER	Former Soviet Union	Fruits and vegetables	5626.83
TYFA-EU	Former Soviet Union	Fruits and vegetables	3327.31
TYFA-EU-SUPPLY	Former Soviet Union	Fruits and vegetables	3335.13
Initial	Former Soviet Union	Grass	361593
Reference	Former Soviet Union	Grass	241838
TOGETHER	Former Soviet Union	Grass	243198
TYFA-EU	Former Soviet Union	Grass	240099
TYFA-EU-SUPPLY	Former Soviet Union	Grass	244753
Initial	Former Soviet Union	Maize, Rice and Wheat	66896.5
Reference	Former Soviet Union	Maize, Rice and Wheat	52959.5
TOGETHER	Former Soviet Union	Maize, Rice and Wheat	48086.5
TYFA-EU	Former Soviet Union	Maize, Rice and Wheat	52575.8
TYFA-EU-SUPPLY	Former Soviet Union	Maize, Rice and Wheat	57502.4
Initial	Former Soviet Union	Oilcrops	15729.7
Reference	Former Soviet Union	Oilcrops	11029.7
TOGETHER	Former Soviet Union	Oilcrops	9013.3
TYFA-EU	Former Soviet Union	Oilcrops	10480.5
TYFA-EU-SUPPLY	Former Soviet Union	Oilcrops	15119
Initial	Former Soviet Union	Other	9307
Reference	Former Soviet Union	Other	10463.8
TOGETHER	Former Soviet Union	Other	6461.21
TYFA-EU	Former Soviet Union	Other	10584.4
TYFA-EU-SUPPLY	Former Soviet Union	Other	10879.4
Initial	Former Soviet Union	Other cereals	31913.8
Reference	Former Soviet Union	Other cereals	27025.3
TOGETHER	Former Soviet Union	Other cereals	22404.9
TYFA-EU	Former Soviet Union	Other cereals	26957.6
TYFA-EU-SUPPLY	Former Soviet Union	Other cereals	32537.3
Initial	Former Soviet Union	Other forages	63692.7
Reference	Former Soviet Union	Other forages	47390.9
TOGETHER	Former Soviet Union	Other forages	44394.7
TYFA-EU	Former Soviet Union	Other forages	46998.7
TYFA-EU-SUPPLY	Former Soviet Union	Other forages	48062
Initial	Former Soviet Union	Pulses	1891.18
Reference	Former Soviet Union	Pulses	1442.53
TOGETHER	Former Soviet Union	Pulses	1678.7
TYFA-EU	Former Soviet Union	Pulses	1497.07
TYFA-EU-SUPPLY	Former Soviet Union	Pulses	1627.05
Initial	Former Soviet Union	Soyabeans	1701.2
Reference	Former Soviet Union	Soyabeans	788.299
TOGETHER	Former Soviet Union	Soyabeans	2093.2
TYFA-EU	Former Soviet Union	Soyabeans	748.709
TYFA-EU-SUPPLY	Former Soviet Union	Soyabeans	753.333
Initial	Former Soviet Union	Sugar plants and products	1754.06
Reference	Former Soviet Union	Sugar plants and products	2254.72
TOGETHER	Former Soviet Union	Sugar plants and products	704.654
TYFA-EU	Former Soviet Union	Sugar plants and products	2246.72
TYFA-EU-SUPPLY	Former Soviet Union	Sugar plants and products	2305.84
Initial	India	Fruits and vegetables	9760.29
Reference	India	Fruits and vegetables	13161
TOGETHER	India	Fruits and vegetables	30070
TYFA-EU	India	Fruits and vegetables	13161
TYFA-EU-SUPPLY	India	Fruits and vegetables	13161
Initial	India	Grass	10374.7
Reference	India	Grass	11745.3
TOGETHER	India	Grass	14806.1
TYFA-EU	India	Grass	11745.3
TYFA-EU-SUPPLY	India	Grass	11745.3
Initial	India	Maize, Rice and Wheat	61923.5
Reference	India	Maize, Rice and Wheat	104320
TOGETHER	India	Maize, Rice and Wheat	71451.2
TYFA-EU	India	Maize, Rice and Wheat	104173
TYFA-EU-SUPPLY	India	Maize, Rice and Wheat	104342
Initial	India	Oilcrops	15267.6
Reference	India	Oilcrops	22287.3
TOGETHER	India	Oilcrops	19009.1
TYFA-EU	India	Oilcrops	22250.9
TYFA-EU-SUPPLY	India	Oilcrops	22292.8
Initial	India	Other	14143.5
Reference	India	Other	19609.4
TOGETHER	India	Other	15783.3
TYFA-EU	India	Other	19605.5
TYFA-EU-SUPPLY	India	Other	19610
Initial	India	Other cereals	15359.6
Reference	India	Other cereals	4069.68
TOGETHER	India	Other cereals	14449.5
TYFA-EU	India	Other cereals	4069.68
TYFA-EU-SUPPLY	India	Other cereals	4069.68
Initial	India	Other forages	24128.8
Reference	India	Other forages	44869.2
TOGETHER	India	Other forages	49992.4
TYFA-EU	India	Other forages	44869.2
TYFA-EU-SUPPLY	India	Other forages	44869.2
Initial	India	Pulses	17742.8
Reference	India	Pulses	3224.79
TOGETHER	India	Pulses	19027.8
TYFA-EU	India	Pulses	3454.5
TYFA-EU-SUPPLY	India	Pulses	3189.99
Initial	India	Soyabeans	7265.75
Reference	India	Soyabeans	8474.96
TOGETHER	India	Soyabeans	5624.69
TYFA-EU	India	Soyabeans	8474.96
TYFA-EU-SUPPLY	India	Soyabeans	8474.96
Initial	India	Sugar plants and products	3776.99
Reference	India	Sugar plants and products	6087.33
TOGETHER	India	Sugar plants and products	2452.03
TYFA-EU	India	Sugar plants and products	6044.65
TYFA-EU-SUPPLY	India	Sugar plants and products	6093.8
Initial	Near and Middle East	Fruits and vegetables	7948.67
Reference	Near and Middle East	Fruits and vegetables	10000.4
TOGETHER	Near and Middle East	Fruits and vegetables	10240.6
TYFA-EU	Near and Middle East	Fruits and vegetables	9979.03
TYFA-EU-SUPPLY	Near and Middle East	Fruits and vegetables	10104.8
Initial	Near and Middle East	Grass	250073
Reference	Near and Middle East	Grass	246932
TOGETHER	Near and Middle East	Grass	292961
TYFA-EU	Near and Middle East	Grass	246447
TYFA-EU-SUPPLY	Near and Middle East	Grass	246556
Initial	Near and Middle East	Maize, Rice and Wheat	26463.5
Reference	Near and Middle East	Maize, Rice and Wheat	25939.4
TOGETHER	Near and Middle East	Maize, Rice and Wheat	22043.9
TYFA-EU	Near and Middle East	Maize, Rice and Wheat	25933.6
TYFA-EU-SUPPLY	Near and Middle East	Maize, Rice and Wheat	25946
Initial	Near and Middle East	Oilcrops	3654.55
Reference	Near and Middle East	Oilcrops	4042.57
TOGETHER	Near and Middle East	Oilcrops	2171.83
TYFA-EU	Near and Middle East	Oilcrops	4031.95
TYFA-EU-SUPPLY	Near and Middle East	Oilcrops	3826.76
Initial	Near and Middle East	Other	4006.43
Reference	Near and Middle East	Other	6037.44
TOGETHER	Near and Middle East	Other	2384.69
TYFA-EU	Near and Middle East	Other	6031.49
TYFA-EU-SUPPLY	Near and Middle East	Other	5997.85
Initial	Near and Middle East	Other cereals	10436.9
Reference	Near and Middle East	Other cereals	6335.15
TOGETHER	Near and Middle East	Other cereals	8467.32
TYFA-EU	Near and Middle East	Other cereals	6323.54
TYFA-EU-SUPPLY	Near and Middle East	Other cereals	6343.84
Initial	Near and Middle East	Other forages	3587.47
Reference	Near and Middle East	Other forages	5384.58
TOGETHER	Near and Middle East	Other forages	5474.88
TYFA-EU	Near and Middle East	Other forages	5371.82
TYFA-EU-SUPPLY	Near and Middle East	Other forages	5376.72
Initial	Near and Middle East	Pulses	2959.93
Reference	Near and Middle East	Pulses	1841.76
TOGETHER	Near and Middle East	Pulses	6199.47
TYFA-EU	Near and Middle East	Pulses	1912.58
TYFA-EU-SUPPLY	Near and Middle East	Pulses	1983.27
Initial	Near and Middle East	Soyabeans	124.028
Reference	Near and Middle East	Soyabeans	228.017
TOGETHER	Near and Middle East	Soyabeans	160.569
TYFA-EU	Near and Middle East	Soyabeans	226.983
TYFA-EU-SUPPLY	Near and Middle East	Soyabeans	226.396
Initial	Near and Middle East	Sugar plants and products	665.405
Reference	Near and Middle East	Sugar plants and products	1811.77
TOGETHER	Near and Middle East	Sugar plants and products	367.795
TYFA-EU	Near and Middle East	Sugar plants and products	1810.08
TYFA-EU-SUPPLY	Near and Middle East	Sugar plants and products	1815.37
Initial	North Africa	Fruits and vegetables	3873.75
Reference	North Africa	Fruits and vegetables	3799.01
TOGETHER	North Africa	Fruits and vegetables	4786.08
TYFA-EU	North Africa	Fruits and vegetables	3798.9
TYFA-EU-SUPPLY	North Africa	Fruits and vegetables	3800.14
Initial	North Africa	Grass	72071.7
Reference	North Africa	Grass	59810.4
TOGETHER	North Africa	Grass	74992
TYFA-EU	North Africa	Grass	58975.4
TYFA-EU-SUPPLY	North Africa	Grass	68205
Initial	North Africa	Maize, Rice and Wheat	10780.2
Reference	North Africa	Maize, Rice and Wheat	2619.42
TOGETHER	North Africa	Maize, Rice and Wheat	8531.66
TYFA-EU	North Africa	Maize, Rice and Wheat	2646.91
TYFA-EU-SUPPLY	North Africa	Maize, Rice and Wheat	2142.89
Initial	North Africa	Oilcrops	4003.59
Reference	North Africa	Oilcrops	2290.95
TOGETHER	North Africa	Oilcrops	3352.96
TYFA-EU	North Africa	Oilcrops	2326.43
TYFA-EU-SUPPLY	North Africa	Oilcrops	1615.14
Initial	North Africa	Other	1420.77
Reference	North Africa	Other	676.672
TOGETHER	North Africa	Other	1888.88
TYFA-EU	North Africa	Other	687.597
TYFA-EU-SUPPLY	North Africa	Other	500.383
Initial	North Africa	Other cereals	5332.39
Reference	North Africa	Other cereals	2357.98
TOGETHER	North Africa	Other cereals	3707.37
TYFA-EU	North Africa	Other cereals	2312.87
TYFA-EU-SUPPLY	North Africa	Other cereals	2834.13
Initial	North Africa	Other forages	1320.09
Reference	North Africa	Other forages	1751.52
TOGETHER	North Africa	Other forages	1962.31
TYFA-EU	North Africa	Other forages	1723.56
TYFA-EU-SUPPLY	North Africa	Other forages	2032.82
Initial	North Africa	Pulses	882.63
Reference	North Africa	Pulses	260.647
TOGETHER	North Africa	Pulses	2745.6
TYFA-EU	North Africa	Pulses	260.061
TYFA-EU-SUPPLY	North Africa	Pulses	266.534
Initial	North Africa	Soyabeans	11.6363
Reference	North Africa	Soyabeans	5.82216
TOGETHER	North Africa	Soyabeans	16.9969
TYFA-EU	North Africa	Soyabeans	5.78654
TYFA-EU-SUPPLY	North Africa	Soyabeans	6.18048
Initial	North Africa	Sugar plants and products	406.314
Reference	North Africa	Sugar plants and products	222.683
TOGETHER	North Africa	Sugar plants and products	220.143
TYFA-EU	North Africa	Sugar plants and products	222.58
TYFA-EU-SUPPLY	North Africa	Sugar plants and products	223.716
Initial	Oceania	Fruits and vegetables	787.513
Reference	Oceania	Fruits and vegetables	917.021
TOGETHER	Oceania	Fruits and vegetables	2683.74
TYFA-EU	Oceania	Fruits and vegetables	901.916
TYFA-EU-SUPPLY	Oceania	Fruits and vegetables	1028.25
Initial	Oceania	Grass	383442
Reference	Oceania	Grass	297073
TOGETHER	Oceania	Grass	484984
TYFA-EU	Oceania	Grass	280496
TYFA-EU-SUPPLY	Oceania	Grass	321440
Initial	Oceania	Maize, Rice and Wheat	21467.9
Reference	Oceania	Maize, Rice and Wheat	26076.1
TOGETHER	Oceania	Maize, Rice and Wheat	33008.5
TYFA-EU	Oceania	Maize, Rice and Wheat	25688.3
TYFA-EU-SUPPLY	Oceania	Maize, Rice and Wheat	29923.7
Initial	Oceania	Oilcrops	3113.28
Reference	Oceania	Oilcrops	4626.51
TOGETHER	Oceania	Oilcrops	2984.79
TYFA-EU	Oceania	Oilcrops	4373.02
TYFA-EU-SUPPLY	Oceania	Oilcrops	4531.34
Initial	Oceania	Other	489.865
Reference	Oceania	Other	715.186
TOGETHER	Oceania	Other	494.525
TYFA-EU	Oceania	Other	735.621
TYFA-EU-SUPPLY	Oceania	Other	794.341
Initial	Oceania	Other cereals	11288.1
Reference	Oceania	Other cereals	13565
TOGETHER	Oceania	Other cereals	23658
TYFA-EU	Oceania	Other cereals	13441.1
TYFA-EU-SUPPLY	Oceania	Other cereals	17179
Initial	Oceania	Other forages	6715.15
Reference	Oceania	Other forages	15497.5
TOGETHER	Oceania	Other forages	12097.7
TYFA-EU	Oceania	Other forages	14423.7
TYFA-EU-SUPPLY	Oceania	Other forages	17202.3
Initial	Oceania	Pulses	2496.99
Reference	Oceania	Pulses	3381.22
TOGETHER	Oceania	Pulses	8612.75
TYFA-EU	Oceania	Pulses	3716.1
TYFA-EU-SUPPLY	Oceania	Pulses	4574.39
Initial	Oceania	Soyabeans	37.4534
Reference	Oceania	Soyabeans	65.185
TOGETHER	Oceania	Soyabeans	53.9777
TYFA-EU	Oceania	Soyabeans	61.6975
TYFA-EU-SUPPLY	Oceania	Soyabeans	65.8801
Initial	Oceania	Sugar plants and products	710.442
Reference	Oceania	Sugar plants and products	599.442
TOGETHER	Oceania	Sugar plants and products	605.062
TYFA-EU	Oceania	Sugar plants and products	586.268
TYFA-EU-SUPPLY	Oceania	Sugar plants and products	690.18
Initial	Rest of America	Fruits and vegetables	7302.64
Reference	Rest of America	Fruits and vegetables	6467.11
TOGETHER	Rest of America	Fruits and vegetables	11668.3
TYFA-EU	Rest of America	Fruits and vegetables	6361.74
TYFA-EU-SUPPLY	Rest of America	Fruits and vegetables	7257.76
Initial	Rest of America	Grass	254415
Reference	Rest of America	Grass	201299
TOGETHER	Rest of America	Grass	216860
TYFA-EU	Rest of America	Grass	200676
TYFA-EU-SUPPLY	Rest of America	Grass	201525
Initial	Rest of America	Maize, Rice and Wheat	20260.5
Reference	Rest of America	Maize, Rice and Wheat	13448.3
TOGETHER	Rest of America	Maize, Rice and Wheat	14833.2
TYFA-EU	Rest of America	Maize, Rice and Wheat	13423.1
TYFA-EU-SUPPLY	Rest of America	Maize, Rice and Wheat	13902.2
Initial	Rest of America	Oilcrops	1658.6
Reference	Rest of America	Oilcrops	1628.05
TOGETHER	Rest of America	Oilcrops	1166.88
TYFA-EU	Rest of America	Oilcrops	1601.58
TYFA-EU-SUPPLY	Rest of America	Oilcrops	1714.48
Initial	Rest of America	Other	9329.9
Reference	Rest of America	Other	8728.6
TOGETHER	Rest of America	Other	6199.72
TYFA-EU	Rest of America	Other	8528.86
TYFA-EU-SUPPLY	Rest of America	Other	9148.42
Initial	Rest of America	Other cereals	4096.81
Reference	Rest of America	Other cereals	4760.89
TOGETHER	Rest of America	Other cereals	4570.25
TYFA-EU	Rest of America	Other cereals	4787.21
TYFA-EU-SUPPLY	Rest of America	Other cereals	5153.26
Initial	Rest of America	Other forages	13940
Reference	Rest of America	Other forages	15009.2
TOGETHER	Rest of America	Other forages	13723.1
TYFA-EU	Rest of America	Other forages	14977.1
TYFA-EU-SUPPLY	Rest of America	Other forages	15066.2
Initial	Rest of America	Pulses	3807.61
Reference	Rest of America	Pulses	1496.61
TOGETHER	Rest of America	Pulses	2184.48
TYFA-EU	Rest of America	Pulses	1565.76
TYFA-EU-SUPPLY	Rest of America	Pulses	1724.1
Initial	Rest of America	Soyabeans	4582.69
Reference	Rest of America	Soyabeans	5813.99
TOGETHER	Rest of America	Soyabeans	3536.74
TYFA-EU	Rest of America	Soyabeans	5324.32
TYFA-EU-SUPPLY	Rest of America	Soyabeans	5391.85
Initial	Rest of America	Sugar plants and products	3110.9
Reference	Rest of America	Sugar plants and products	2643.46
TOGETHER	Rest of America	Sugar plants and products	1315.2
TYFA-EU	Rest of America	Sugar plants and products	2611.31
TYFA-EU-SUPPLY	Rest of America	Sugar plants and products	2877.63
Initial	Rest of Asia	Fruits and vegetables	11542.7
Reference	Rest of Asia	Fruits and vegetables	11329.1
TOGETHER	Rest of Asia	Fruits and vegetables	25713.9
TYFA-EU	Rest of Asia	Fruits and vegetables	11298.8
TYFA-EU-SUPPLY	Rest of Asia	Fruits and vegetables	11549.7
Initial	Rest of Asia	Grass	168108
Reference	Rest of Asia	Grass	189948
TOGETHER	Rest of Asia	Grass	190193
TYFA-EU	Rest of Asia	Grass	189805
TYFA-EU-SUPPLY	Rest of Asia	Grass	190103
Initial	Rest of Asia	Maize, Rice and Wheat	85593.6
Reference	Rest of Asia	Maize, Rice and Wheat	112281
TOGETHER	Rest of Asia	Maize, Rice and Wheat	73902.4
TYFA-EU	Rest of Asia	Maize, Rice and Wheat	111973
TYFA-EU-SUPPLY	Rest of Asia	Maize, Rice and Wheat	115011
Initial	Rest of Asia	Oilcrops	12732.9
Reference	Rest of Asia	Oilcrops	14096.3
TOGETHER	Rest of Asia	Oilcrops	12924.3
TYFA-EU	Rest of Asia	Oilcrops	13987.7
TYFA-EU-SUPPLY	Rest of Asia	Oilcrops	14107.6
Initial	Rest of Asia	Other	31383
Reference	Rest of Asia	Other	41645.3
TOGETHER	Rest of Asia	Other	24670.6
TYFA-EU	Rest of Asia	Other	40446.3
TYFA-EU-SUPPLY	Rest of Asia	Other	46408.6
Initial	Rest of Asia	Other cereals	2254.02
Reference	Rest of Asia	Other cereals	1701.23
TOGETHER	Rest of Asia	Other cereals	3939.9
TYFA-EU	Rest of Asia	Other cereals	1697.05
TYFA-EU-SUPPLY	Rest of Asia	Other cereals	1869.78
Initial	Rest of Asia	Other forages	3971.47
Reference	Rest of Asia	Other forages	3132.74
TOGETHER	Rest of Asia	Other forages	3711.66
TYFA-EU	Rest of Asia	Other forages	3128.82
TYFA-EU-SUPPLY	Rest of Asia	Other forages	3138.21
Initial	Rest of Asia	Pulses	6935.06
Reference	Rest of Asia	Pulses	6939.73
TOGETHER	Rest of Asia	Pulses	14347.1
TYFA-EU	Rest of Asia	Pulses	7363.37
TYFA-EU-SUPPLY	Rest of Asia	Pulses	8346.19
Initial	Rest of Asia	Soyabeans	1596.61
Reference	Rest of Asia	Soyabeans	1499.75
TOGETHER	Rest of Asia	Soyabeans	1728.11
TYFA-EU	Rest of Asia	Soyabeans	1495.22
TYFA-EU-SUPPLY	Rest of Asia	Soyabeans	1497.32
Initial	Rest of Asia	Sugar plants and products	3437.82
Reference	Rest of Asia	Sugar plants and products	4912.35
TOGETHER	Rest of Asia	Sugar plants and products	1714.14
TYFA-EU	Rest of Asia	Sugar plants and products	4882.29
TYFA-EU-SUPPLY	Rest of Asia	Sugar plants and products	5114.71
Initial	Rest of Europe	Fruits and vegetables	1674.81
Reference	Rest of Europe	Fruits and vegetables	880.666
TOGETHER	Rest of Europe	Fruits and vegetables	3318.68
TYFA-EU	Rest of Europe	Fruits and vegetables	868.705
TYFA-EU-SUPPLY	Rest of Europe	Fruits and vegetables	968.658
Initial	Rest of Europe	Grass	7568.72
Reference	Rest of Europe	Grass	8426.7
TOGETHER	Rest of Europe	Grass	5211.58
TYFA-EU	Rest of Europe	Grass	8337.11
TYFA-EU-SUPPLY	Rest of Europe	Grass	8570.86
Initial	Rest of Europe	Maize, Rice and Wheat	4395
Reference	Rest of Europe	Maize, Rice and Wheat	2855.72
TOGETHER	Rest of Europe	Maize, Rice and Wheat	5379.37
TYFA-EU	Rest of Europe	Maize, Rice and Wheat	2844.63
TYFA-EU-SUPPLY	Rest of Europe	Maize, Rice and Wheat	3314.56
Initial	Rest of Europe	Oilcrops	741.845
Reference	Rest of Europe	Oilcrops	623.896
TOGETHER	Rest of Europe	Oilcrops	696.135
TYFA-EU	Rest of Europe	Oilcrops	552.844
TYFA-EU-SUPPLY	Rest of Europe	Oilcrops	752.147
Initial	Rest of Europe	Other	374.788
Reference	Rest of Europe	Other	704.387
TOGETHER	Rest of Europe	Other	476.405
TYFA-EU	Rest of Europe	Other	666.667
TYFA-EU-SUPPLY	Rest of Europe	Other	1158.8
Initial	Rest of Europe	Other cereals	937.851
Reference	Rest of Europe	Other cereals	837.429
TOGETHER	Rest of Europe	Other cereals	2037.74
TYFA-EU	Rest of Europe	Other cereals	832.254
TYFA-EU-SUPPLY	Rest of Europe	Other cereals	1050.06
Initial	Rest of Europe	Other forages	2084.64
Reference	Rest of Europe	Other forages	3865.1
TOGETHER	Rest of Europe	Other forages	1906.45
TYFA-EU	Rest of Europe	Other forages	3820.1
TYFA-EU-SUPPLY	Rest of Europe	Other forages	3937.89
Initial	Rest of Europe	Pulses	163.007
Reference	Rest of Europe	Pulses	139.492
TOGETHER	Rest of Europe	Pulses	254.12
TYFA-EU	Rest of Europe	Pulses	140.183
TYFA-EU-SUPPLY	Rest of Europe	Pulses	141.768
Initial	Rest of Europe	Soyabeans	277.075
Reference	Rest of Europe	Soyabeans	204.009
TOGETHER	Rest of Europe	Soyabeans	333.381
TYFA-EU	Rest of Europe	Soyabeans	200.873
TYFA-EU-SUPPLY	Rest of Europe	Soyabeans	201.078
Initial	Rest of Europe	Sugar plants and products	163.742
Reference	Rest of Europe	Sugar plants and products	308.144
TOGETHER	Rest of Europe	Sugar plants and products	180.331
TYFA-EU	Rest of Europe	Sugar plants and products	301.078
TYFA-EU-SUPPLY	Rest of Europe	Sugar plants and products	356.059
Initial	West Africa	Fruits and vegetables	5887.12
Reference	West Africa	Fruits and vegetables	12864.9
TOGETHER	West Africa	Fruits and vegetables	22464.4
TYFA-EU	West Africa	Fruits and vegetables	12941.5
TYFA-EU-SUPPLY	West Africa	Fruits and vegetables	12941.5
Initial	West Africa	Grass	144554
Reference	West Africa	Grass	138339
TOGETHER	West Africa	Grass	230108
TYFA-EU	West Africa	Grass	170618
TYFA-EU-SUPPLY	West Africa	Grass	177740
Initial	West Africa	Maize, Rice and Wheat	13449.2
Reference	West Africa	Maize, Rice and Wheat	41801.3
TOGETHER	West Africa	Maize, Rice and Wheat	31239
TYFA-EU	West Africa	Maize, Rice and Wheat	40746.3
TYFA-EU-SUPPLY	West Africa	Maize, Rice and Wheat	34864.9
Initial	West Africa	Oilcrops	7716.14
Reference	West Africa	Oilcrops	28819.2
TOGETHER	West Africa	Oilcrops	18513.8
TYFA-EU	West Africa	Oilcrops	29719.2
TYFA-EU-SUPPLY	West Africa	Oilcrops	30763.8
Initial	West Africa	Other	28789.5
Reference	West Africa	Other	62401.1
TOGETHER	West Africa	Other	43184.5
TYFA-EU	West Africa	Other	58013.5
TYFA-EU-SUPPLY	West Africa	Other	60062.2
Initial	West Africa	Other cereals	30324.3
Reference	West Africa	Other cereals	57902.5
TOGETHER	West Africa	Other cereals	49319
TYFA-EU	West Africa	Other cereals	60523
TYFA-EU-SUPPLY	West Africa	Other cereals	63350.9
Initial	West Africa	Pulses	11400.5
Reference	West Africa	Pulses	25606.3
TOGETHER	West Africa	Pulses	25262.5
TYFA-EU	West Africa	Pulses	27451.6
TYFA-EU-SUPPLY	West Africa	Pulses	28389.6
Initial	West Africa	Soyabeans	670.748
Reference	West Africa	Soyabeans	1377.4
TOGETHER	West Africa	Soyabeans	2923.82
TYFA-EU	West Africa	Soyabeans	1376.47
TYFA-EU-SUPPLY	West Africa	Soyabeans	1406.23
Initial	West Africa	Sugar plants and products	159.483
Reference	West Africa	Sugar plants and products	1006.54
TOGETHER	West Africa	Sugar plants and products	272.994
TYFA-EU	West Africa	Sugar plants and products	1007.65

## Sheet: PROD_CAL
s	v	r	r2	Prod_cal
Initial	Animal products	Brazil, Argentina	Rest of the World	56421.2
Initial	Animal products	Canada, USA	Rest of the World	140781
Initial	Animal products	China	Rest of the World	268995
Initial	Animal products	Former Soviet Union	Rest of the World	68675.1
Initial	Animal products	India	Rest of the World	88548.6
Initial	Animal products	Near and Middle East	Rest of the World	30775.7
Initial	Animal products	North Africa	Rest of the World	13757.2
Initial	Animal products	Oceania	Rest of the World	22958.3
Initial	Animal products	ECS Africa	Rest of the World	28379.9
Initial	Animal products	Rest of America	Rest of the World	63383.2
Initial	Animal products	Rest of Asia	Rest of the World	113865
Initial	Animal products	Rest of Europe	Rest of the World	14302
Initial	Animal products	EU-27	EU-27	205380
Initial	Animal products	West Africa	Rest of the World	8503.2
Initial	Vegetal products	Brazil, Argentina	Rest of the World	1.4356e+06
Initial	Vegetal products	Canada, USA	Rest of the World	2.30581e+06
Initial	Vegetal products	China	Rest of the World	2.34541e+06
Initial	Vegetal products	Former Soviet Union	Rest of the World	831258
Initial	Vegetal products	India	Rest of the World	1.36792e+06
Initial	Vegetal products	Near and Middle East	Rest of the World	317089
Initial	Vegetal products	North Africa	Rest of the World	172587
Initial	Vegetal products	Oceania	Rest of the World	156441
Initial	Vegetal products	ECS Africa	Rest of the World	435092
Initial	Vegetal products	Rest of America	Rest of the World	527082
Initial	Vegetal products	Rest of Asia	Rest of the World	2.20528e+06
Initial	Vegetal products	Rest of Europe	Rest of the World	87366.2
Initial	Vegetal products	EU-27	EU-27	1.51999e+06
Initial	Vegetal products	West Africa	Rest of the World	434932
Reference	Animal products	Brazil, Argentina	Rest of the World	94348.4
Reference	Animal products	Canada, USA	Rest of the World	189846
Reference	Animal products	China	Rest of the World	249483
Reference	Animal products	Former Soviet Union	Rest of the World	86357
Reference	Animal products	India	Rest of the World	257054
Reference	Animal products	Near and Middle East	Rest of the World	60638.7
Reference	Animal products	North Africa	Rest of the World	25693.2
Reference	Animal products	Oceania	Rest of the World	41952.3
Reference	Animal products	ECS Africa	Rest of the World	118093
Reference	Animal products	Rest of America	Rest of the World	100600
Reference	Animal products	Rest of Asia	Rest of the World	180402
Reference	Animal products	Rest of Europe	Rest of the World	18473.1
Reference	Animal products	EU-27	EU-27	202712
Reference	Animal products	West Africa	Rest of the World	57978.8
Reference	Vegetal products	Brazil, Argentina	Rest of the World	2.10532e+06
Reference	Vegetal products	Canada, USA	Rest of the World	3.15533e+06
Reference	Vegetal products	China	Rest of the World	2.24109e+06
Reference	Vegetal products	Former Soviet Union	Rest of the World	1.01902e+06
Reference	Vegetal products	India	Rest of the World	2.40974e+06
Reference	Vegetal products	Near and Middle East	Rest of the World	517995
Reference	Vegetal products	North Africa	Rest of the World	109877
Reference	Vegetal products	Oceania	Rest of the World	268454
Reference	Vegetal products	ECS Africa	Rest of the World	1.63922e+06
Reference	Vegetal products	Rest of America	Rest of the World	782248
Reference	Vegetal products	Rest of Asia	Rest of the World	3.44845e+06
Reference	Vegetal products	Rest of Europe	Rest of the World	101552
Reference	Vegetal products	EU-27	EU-27	1.5653e+06
Reference	Vegetal products	West Africa	Rest of the World	1.52531e+06
TOGETHER	Animal products	Brazil, Argentina	Rest of the World	60367.9
TOGETHER	Animal products	Canada, USA	Rest of the World	119236
TOGETHER	Animal products	China	Rest of the World	236804
TOGETHER	Animal products	Former Soviet Union	Rest of the World	61882.5
TOGETHER	Animal products	India	Rest of the World	227535
TOGETHER	Animal products	Near and Middle East	Rest of the World	47975.1
TOGETHER	Animal products	North Africa	Rest of the World	20301.7
TOGETHER	Animal products	Oceania	Rest of the World	31906.1
TOGETHER	Animal products	ECS Africa	Rest of the World	101392
TOGETHER	Animal products	Rest of America	Rest of the World	85179.1
TOGETHER	Animal products	Rest of Asia	Rest of the World	153375
TOGETHER	Animal products	Rest of Europe	Rest of the World	10847.7
TOGETHER	Animal products	EU-27	EU-27	99100.6
TOGETHER	Animal products	West Africa	Rest of the World	62897.3
TOGETHER	Vegetal products	Brazil, Argentina	Rest of the World	1.41086e+06
TOGETHER	Vegetal products	Canada, USA	Rest of the World	2.40545e+06
TOGETHER	Vegetal products	China	Rest of the World	2.11315e+06
TOGETHER	Vegetal products	Former Soviet Union	Rest of the World	877835
TOGETHER	Vegetal products	India	Rest of the World	2.1837e+06
TOGETHER	Vegetal products	Near and Middle East	Rest of the World	452870
TOGETHER	Vegetal products	North Africa	Rest of the World	246439
TOGETHER	Vegetal products	Oceania	Rest of the World	218773
TOGETHER	Vegetal products	ECS Africa	Rest of the World	1.40777e+06
TOGETHER	Vegetal products	Rest of America	Rest of the World	693000
TOGETHER	Vegetal products	Rest of Asia	Rest of the World	2.72024e+06
TOGETHER	Vegetal products	Rest of Europe	Rest of the World	88430.4
TOGETHER	Vegetal products	EU-27	EU-27	961759
TOGETHER	Vegetal products	West Africa	Rest of the World	1.51185e+06
TYFA-EU	Animal products	Brazil, Argentina	Rest of the World	93279.5
TYFA-EU	Animal products	Canada, USA	Rest of the World	189926
TYFA-EU	Animal products	China	Rest of the World	248868
TYFA-EU	Animal products	Former Soviet Union	Rest of the World	85701.6
TYFA-EU	Animal products	India	Rest of the World	257054
TYFA-EU	Animal products	Near and Middle East	Rest of the World	60486.9
TYFA-EU	Animal products	North Africa	Rest of the World	25453.9
TYFA-EU	Animal products	Oceania	Rest of the World	39366.8
TYFA-EU	Animal products	ECS Africa	Rest of the World	117919
TYFA-EU	Animal products	Rest of America	Rest of the World	98956.2
TYFA-EU	Animal products	Rest of Asia	Rest of the World	179222
TYFA-EU	Animal products	Rest of Europe	Rest of the World	17142
TYFA-EU	Animal products	EU-27	EU-27	106317
TYFA-EU	Animal products	West Africa	Rest of the World	60036.8
TYFA-EU	Vegetal products	Brazil, Argentina	Rest of the World	1.90714e+06
TYFA-EU	Vegetal products	Canada, USA	Rest of the World	3.08506e+06
TYFA-EU	Vegetal products	China	Rest of the World	2.23621e+06
TYFA-EU	Vegetal products	Former Soviet Union	Rest of the World	1.00792e+06
TYFA-EU	Vegetal products	India	Rest of the World	2.40552e+06
TYFA-EU	Vegetal products	Near and Middle East	Rest of the World	517687
TYFA-EU	Vegetal products	North Africa	Rest of the World	110400
TYFA-EU	Vegetal products	Oceania	Rest of the World	264907
TYFA-EU	Vegetal products	ECS Africa	Rest of the World	1.63749e+06
TYFA-EU	Vegetal products	Rest of America	Rest of the World	772950
TYFA-EU	Vegetal products	Rest of Asia	Rest of the World	3.32725e+06
TYFA-EU	Vegetal products	Rest of Europe	Rest of the World	99472.7
TYFA-EU	Vegetal products	EU-27	EU-27	1.01797e+06
TYFA-EU	Vegetal products	West Africa	Rest of the World	1.53547e+06
TYFA-EU-SUPPLY	Animal products	Brazil, Argentina	Rest of the World	97893.9
TYFA-EU-SUPPLY	Animal products	Canada, USA	Rest of the World	199081
TYFA-EU-SUPPLY	Animal products	China	Rest of the World	252748
TYFA-EU-SUPPLY	Animal products	Former Soviet Union	Rest of the World	87941.8
TYFA-EU-SUPPLY	Animal products	India	Rest of the World	257054
TYFA-EU-SUPPLY	Animal products	Near and Middle East	Rest of the World	60499
TYFA-EU-SUPPLY	Animal products	North Africa	Rest of the World	28100.4
TYFA-EU-SUPPLY	Animal products	Oceania	Rest of the World	46394.2
TYFA-EU-SUPPLY	Animal products	ECS Africa	Rest of the World	118366
TYFA-EU-SUPPLY	Animal products	Rest of America	Rest of the World	104667
TYFA-EU-SUPPLY	Animal products	Rest of Asia	Rest of the World	182300
TYFA-EU-SUPPLY	Animal products	Rest of Europe	Rest of the World	20587.7
TYFA-EU-SUPPLY	Animal products	EU-27	EU-27	159649
TYFA-EU-SUPPLY	Animal products	West Africa	Rest of the World	58226.3
TYFA-EU-SUPPLY	Vegetal products	Brazil, Argentina	Rest of the World	2.05567e+06
TYFA-EU-SUPPLY	Vegetal products	Canada, USA	Rest of the World	3.32323e+06
TYFA-EU-SUPPLY	Vegetal products	China	Rest of the World	2.2804e+06
TYFA-EU-SUPPLY	Vegetal products	Former Soviet Union	Rest of the World	1.1631e+06
TYFA-EU-SUPPLY	Vegetal products	India	Rest of the World	2.41038e+06
TYFA-EU-SUPPLY	Vegetal products	Near and Middle East	Rest of the World	518074
TYFA-EU-SUPPLY	Vegetal products	North Africa	Rest of the World	98780.5
TYFA-EU-SUPPLY	Vegetal products	Oceania	Rest of the World	314474
TYFA-EU-SUPPLY	Vegetal products	ECS Africa	Rest of the World	1.64823e+06
TYFA-EU-SUPPLY	Vegetal products	Rest of America	Rest of the World	822735
TYFA-EU-SUPPLY	Vegetal products	Rest of Asia	Rest of the World	3.65839e+06
TYFA-EU-SUPPLY	Vegetal products	Rest of Europe	Rest of the World	120085
TYFA-EU-SUPPLY	Vegetal products	EU-27	EU-27	839128
TYFA-EU-SUPPLY	Vegetal products	West Africa	Rest of the World	1.52881e+06

## Sheet: IMP_EXP_CAL
s	v	t	r	r2	Trade_Cal
Initial	Animal products	Import	Brazil, Argentina	Rest of the World	460.234
Initial	Animal products	Import	Canada, USA	Rest of the World	6397.31
Initial	Animal products	Import	China	Rest of the World	15285.5
Initial	Animal products	Import	Former Soviet Union	Rest of the World	8726.2
Initial	Animal products	Import	India	Rest of the World	68.1059
Initial	Animal products	Import	Near and Middle East	Rest of the World	6291.93
Initial	Animal products	Import	North Africa	Rest of the World	3027.01
Initial	Animal products	Import	Oceania	Rest of the World	1337.02
Initial	Animal products	Import	ECS Africa	Rest of the World	2557.2
Initial	Animal products	Import	Rest of America	Rest of the World	9638.46
Initial	Animal products	Import	Rest of Asia	Rest of the World	20749.4
Initial	Animal products	Import	Rest of Europe	Rest of the World	10196
Initial	Animal products	Import	EU-27	EU-27	11133.3
Initial	Animal products	Import	West Africa	Rest of the World	3850.51
Initial	Vegetal products	Import	Brazil, Argentina	Rest of the World	25503.6
Initial	Vegetal products	Import	Canada, USA	Rest of the World	90881.3
Initial	Vegetal products	Import	China	Rest of the World	302402
Initial	Vegetal products	Import	Former Soviet Union	Rest of the World	46227.7
Initial	Vegetal products	Import	India	Rest of the World	83512.1
Initial	Vegetal products	Import	Near and Middle East	Rest of the World	250458
Initial	Vegetal products	Import	North Africa	Rest of the World	157825
Initial	Vegetal products	Import	Oceania	Rest of the World	13292.6
Initial	Vegetal products	Import	ECS Africa	Rest of the World	92632.7
Initial	Vegetal products	Import	Rest of America	Rest of the World	228864
Initial	Vegetal products	Import	Rest of Asia	Rest of the World	379891
Initial	Vegetal products	Import	Rest of Europe	Rest of the World	116507
Initial	Vegetal products	Import	EU-27	EU-27	358266
Initial	Vegetal products	Import	West Africa	Rest of the World	63847.4
Initial	Animal products	Export	Brazil, Argentina	Rest of the World	9646.65
Initial	Animal products	Export	Canada, USA	Rest of the World	16696.2
Initial	Animal products	Export	China	Rest of the World	7294.77
Initial	Animal products	Export	Former Soviet Union	Rest of the World	3951.28
Initial	Animal products	Export	India	Rest of the World	1089.22
Initial	Animal products	Export	Near and Middle East	Rest of the World	1547.09
Initial	Animal products	Export	North Africa	Rest of the World	917.606
Initial	Animal products	Export	Oceania	Rest of the World	12529.5
Initial	Animal products	Export	ECS Africa	Rest of the World	927.878
Initial	Animal products	Export	Rest of America	Rest of the World	11367.4
Initial	Animal products	Export	Rest of Asia	Rest of the World	6239.77
Initial	Animal products	Export	Rest of Europe	Rest of the World	7179.95
Initial	Animal products	Export	EU-27	EU-27	19048.2
Initial	Animal products	Export	West Africa	Rest of the World	279.858
Initial	Vegetal products	Export	Brazil, Argentina	Rest of the World	474877
Initial	Vegetal products	Export	Canada, USA	Rest of the World	619307
Initial	Vegetal products	Export	China	Rest of the World	61753.5
Initial	Vegetal products	Export	Former Soviet Union	Rest of the World	162358
Initial	Vegetal products	Export	India	Rest of the World	65732.5
Initial	Vegetal products	Export	Near and Middle East	Rest of the World	28794.7
Initial	Vegetal products	Export	North Africa	Rest of the World	11230.2
Initial	Vegetal products	Export	Oceania	Rest of the World	64727.1
Initial	Vegetal products	Export	ECS Africa	Rest of the World	17889.4
Initial	Vegetal products	Export	Rest of America	Rest of the World	91708.7
Initial	Vegetal products	Export	Rest of Asia	Rest of the World	404767
Initial	Vegetal products	Export	Rest of Europe	Rest of the World	39520.7
Initial	Vegetal products	Export	EU-27	EU-27	146775
Initial	Vegetal products	Export	West Africa	Rest of the World	17217
Reference	Animal products	Import	Brazil, Argentina	Rest of the World	634.98
Reference	Animal products	Import	Canada, USA	Rest of the World	7929.03
Reference	Animal products	Import	China	Rest of the World	13659.4
Reference	Animal products	Import	Former Soviet Union	Rest of the World	11339.3
Reference	Animal products	Import	India	Rest of the World	113.251
Reference	Animal products	Import	Near and Middle East	Rest of the World	12721
Reference	Animal products	Import	North Africa	Rest of the World	8355.26
Reference	Animal products	Import	Oceania	Rest of the World	2086.9
Reference	Animal products	Import	ECS Africa	Rest of the World	13301.2
Reference	Animal products	Import	Rest of America	Rest of the World	14820.5
Reference	Animal products	Import	Rest of Asia	Rest of the World	29265
Reference	Animal products	Import	Rest of Europe	Rest of the World	10157
Reference	Animal products	Import	EU-27	EU-27	9669.85
Reference	Animal products	Import	West Africa	Rest of the World	44219.6
Reference	Vegetal products	Import	Brazil, Argentina	Rest of the World	36483.6
Reference	Vegetal products	Import	Canada, USA	Rest of the World	130319
Reference	Vegetal products	Import	China	Rest of the World	335097
Reference	Vegetal products	Import	Former Soviet Union	Rest of the World	55771.8
Reference	Vegetal products	Import	India	Rest of the World	150471
Reference	Vegetal products	Import	Near and Middle East	Rest of the World	462812
Reference	Vegetal products	Import	North Africa	Rest of the World	387630
Reference	Vegetal products	Import	Oceania	Rest of the World	21937.9
Reference	Vegetal products	Import	ECS Africa	Rest of the World	372294
Reference	Vegetal products	Import	Rest of America	Rest of the World	316786
Reference	Vegetal products	Import	Rest of Asia	Rest of the World	598997
Reference	Vegetal products	Import	Rest of Europe	Rest of the World	99454.7
Reference	Vegetal products	Import	EU-27	EU-27	387361
Reference	Vegetal products	Import	West Africa	Rest of the World	350513
Reference	Animal products	Export	Brazil, Argentina	Rest of the World	21791.6
Reference	Animal products	Export	Canada, USA	Rest of the World	31991.9
Reference	Animal products	Export	China	Rest of the World	12512
Reference	Animal products	Export	Former Soviet Union	Rest of the World	7774.83
Reference	Animal products	Export	India	Rest of the World	2.12616e-06
Reference	Animal products	Export	Near and Middle East	Rest of the World	1903.21
Reference	Animal products	Export	North Africa	Rest of the World	7.98226e-06
Reference	Animal products	Export	Oceania	Rest of the World	26137
Reference	Animal products	Export	ECS Africa	Rest of the World	1412.17
Reference	Animal products	Export	Rest of America	Rest of the World	17399.7
Reference	Animal products	Export	Rest of Asia	Rest of the World	10138.8
Reference	Animal products	Export	Rest of Europe	Rest of the World	11292.2
Reference	Animal products	Export	EU-27	EU-27	33256.8
Reference	Animal products	Export	West Africa	Rest of the World	3.44391e-06
Reference	Vegetal products	Export	Brazil, Argentina	Rest of the World	788805
Reference	Vegetal products	Export	Canada, USA	Rest of the World	1.01408e+06
Reference	Vegetal products	Export	China	Rest of the World	117774
Reference	Vegetal products	Export	Former Soviet Union	Rest of the World	285213
Reference	Vegetal products	Export	India	Rest of the World	8045.61
Reference	Vegetal products	Export	Near and Middle East	Rest of the World	31953.2
Reference	Vegetal products	Export	North Africa	Rest of the World	2131.75
Reference	Vegetal products	Export	Oceania	Rest of the World	125701
Reference	Vegetal products	Export	ECS Africa	Rest of the World	79903.6
Reference	Vegetal products	Export	Rest of America	Rest of the World	174627
Reference	Vegetal products	Export	Rest of Asia	Rest of the World	738424
Reference	Vegetal products	Export	Rest of Europe	Rest of the World	52936
Reference	Vegetal products	Export	EU-27	EU-27	265174
Reference	Vegetal products	Export	West Africa	Rest of the World	8582.65
TOGETHER	Animal products	Import	Brazil, Argentina	Rest of the World	454.884
TOGETHER	Animal products	Import	Canada, USA	Rest of the World	4813.45
TOGETHER	Animal products	Import	China	Rest of the World	12545.7
TOGETHER	Animal products	Import	Former Soviet Union	Rest of the World	7316.67
TOGETHER	Animal products	Import	India	Rest of the World	110.098
TOGETHER	Animal products	Import	Near and Middle East	Rest of the World	11200.3
TOGETHER	Animal products	Import	North Africa	Rest of the World	9101.94
TOGETHER	Animal products	Import	Oceania	Rest of the World	1401.14
TOGETHER	Animal products	Import	ECS Africa	Rest of the World	9610.13
TOGETHER	Animal products	Import	Rest of America	Rest of the World	12805.9
TOGETHER	Animal products	Import	Rest of Asia	Rest of the World	26400.1
TOGETHER	Animal products	Import	Rest of Europe	Rest of the World	7529.65
TOGETHER	Animal products	Import	EU-27	EU-27	2143.39
TOGETHER	Animal products	Import	West Africa	Rest of the World	27229.6
TOGETHER	Vegetal products	Import	Brazil, Argentina	Rest of the World	32909.1
TOGETHER	Vegetal products	Import	Canada, USA	Rest of the World	102805
TOGETHER	Vegetal products	Import	China	Rest of the World	285435
TOGETHER	Vegetal products	Import	Former Soviet Union	Rest of the World	47284
TOGETHER	Vegetal products	Import	India	Rest of the World	123770
TOGETHER	Vegetal products	Import	Near and Middle East	Rest of the World	375405
TOGETHER	Vegetal products	Import	North Africa	Rest of the World	196179
TOGETHER	Vegetal products	Import	Oceania	Rest of the World	16659.2
TOGETHER	Vegetal products	Import	ECS Africa	Rest of the World	225818
TOGETHER	Vegetal products	Import	Rest of America	Rest of the World	296376
TOGETHER	Vegetal products	Import	Rest of Asia	Rest of the World	542669
TOGETHER	Vegetal products	Import	Rest of Europe	Rest of the World	111510
TOGETHER	Vegetal products	Import	EU-27	EU-27	136282
TOGETHER	Vegetal products	Import	West Africa	Rest of the World	192393
TOGETHER	Animal products	Export	Brazil, Argentina	Rest of the World	13379.5
TOGETHER	Animal products	Export	Canada, USA	Rest of the World	21961.8
TOGETHER	Animal products	Export	China	Rest of the World	9141.13
TOGETHER	Animal products	Export	Former Soviet Union	Rest of the World	6083.12
TOGETHER	Animal products	Export	India	Rest of the World	930.83
TOGETHER	Animal products	Export	Near and Middle East	Rest of the World	4.948e-06
TOGETHER	Animal products	Export	Oceania	Rest of the World	20680.5
TOGETHER	Animal products	Export	ECS Africa	Rest of the World	1110.13
TOGETHER	Animal products	Export	Rest of America	Rest of the World	13673.9
TOGETHER	Animal products	Export	Rest of Asia	Rest of the World	7821.88
TOGETHER	Animal products	Export	Rest of Europe	Rest of the World	8835.5
TOGETHER	Animal products	Export	EU-27	EU-27	25772.6
TOGETHER	Animal products	Export	West Africa	Rest of the World	358.536
TOGETHER	Vegetal products	Export	Brazil, Argentina	Rest of the World	427436
TOGETHER	Vegetal products	Export	Canada, USA	Rest of the World	805381
TOGETHER	Vegetal products	Export	China	Rest of the World	98826.7
TOGETHER	Vegetal products	Export	Former Soviet Union	Rest of the World	251160
TOGETHER	Vegetal products	Export	India	Rest of the World	52551.2
TOGETHER	Vegetal products	Export	Near and Middle East	Rest of the World	4670.45
TOGETHER	Vegetal products	Export	North Africa	Rest of the World	3873.97
TOGETHER	Vegetal products	Export	Oceania	Rest of the World	114903
TOGETHER	Vegetal products	Export	ECS Africa	Rest of the World	21213.6
TOGETHER	Vegetal products	Export	Rest of America	Rest of the World	124009
TOGETHER	Vegetal products	Export	Rest of Asia	Rest of the World	493044
TOGETHER	Vegetal products	Export	Rest of Europe	Rest of the World	27448.2
TOGETHER	Vegetal products	Export	EU-27	EU-27	245101
TOGETHER	Vegetal products	Export	West Africa	Rest of the World	22124.4
TYFA-EU	Animal products	Import	Brazil, Argentina	Rest of the World	634.787
TYFA-EU	Animal products	Import	Canada, USA	Rest of the World	7915.58
TYFA-EU	Animal products	Import	China	Rest of the World	13659.9
TYFA-EU	Animal products	Import	Former Soviet Union	Rest of the World	11339.7
TYFA-EU	Animal products	Import	India	Rest of the World	113.251
TYFA-EU	Animal products	Import	Near and Middle East	Rest of the World	12719.2
TYFA-EU	Animal products	Import	North Africa	Rest of the World	8586.99
TYFA-EU	Animal products	Import	Oceania	Rest of the World	2084.62
TYFA-EU	Animal products	Import	ECS Africa	Rest of the World	13301.2
TYFA-EU	Animal products	Import	Rest of America	Rest of the World	14825.5
TYFA-EU	Animal products	Import	Rest of Asia	Rest of the World	29263.3
TYFA-EU	Animal products	Import	Rest of Europe	Rest of the World	10141.5
TYFA-EU	Animal products	Import	EU-27	EU-27	2143.39
TYFA-EU	Animal products	Import	West Africa	Rest of the World	42187
TYFA-EU	Vegetal products	Import	Brazil, Argentina	Rest of the World	33874.6
TYFA-EU	Vegetal products	Import	Canada, USA	Rest of the World	129815
TYFA-EU	Vegetal products	Import	China	Rest of the World	325362
TYFA-EU	Vegetal products	Import	Former Soviet Union	Rest of the World	55375.1
TYFA-EU	Vegetal products	Import	India	Rest of the World	151236
TYFA-EU	Vegetal products	Import	Near and Middle East	Rest of the World	460297
TYFA-EU	Vegetal products	Import	North Africa	Rest of the World	382760
TYFA-EU	Vegetal products	Import	Oceania	Rest of the World	21428.2
TYFA-EU	Vegetal products	Import	ECS Africa	Rest of the World	370837
TYFA-EU	Vegetal products	Import	Rest of America	Rest of the World	313315
TYFA-EU	Vegetal products	Import	Rest of Asia	Rest of the World	595509
TYFA-EU	Vegetal products	Import	Rest of Europe	Rest of the World	97825.4
TYFA-EU	Vegetal products	Import	EU-27	EU-27	162184
TYFA-EU	Vegetal products	Import	West Africa	Rest of the World	333084
TYFA-EU	Animal products	Export	Brazil, Argentina	Rest of the World	20754
TYFA-EU	Animal products	Export	Canada, USA	Rest of the World	32076.7
TYFA-EU	Animal products	Export	China	Rest of the World	11928.9
TYFA-EU	Animal products	Export	Former Soviet Union	Rest of the World	7114.96
TYFA-EU	Animal products	Export	India	Rest of the World	2.01856e-06
TYFA-EU	Animal products	Export	Near and Middle East	Rest of the World	1759.8
TYFA-EU	Animal products	Export	North Africa	Rest of the World	7.38166e-06
TYFA-EU	Animal products	Export	Oceania	Rest of the World	23595.3
TYFA-EU	Animal products	Export	ECS Africa	Rest of the World	1233.69
TYFA-EU	Animal products	Export	Rest of America	Rest of the World	15653.5
TYFA-EU	Animal products	Export	Rest of Asia	Rest of the World	8971.33
TYFA-EU	Animal products	Export	Rest of Europe	Rest of the World	9906.57
TYFA-EU	Animal products	Export	EU-27	EU-27	33039.4
TYFA-EU	Animal products	Export	West Africa	Rest of the World	3.14963e-06
TYFA-EU	Vegetal products	Export	Brazil, Argentina	Rest of the World	686448
TYFA-EU	Vegetal products	Export	Canada, USA	Rest of the World	966388
TYFA-EU	Vegetal products	Export	China	Rest of the World	113822
TYFA-EU	Vegetal products	Export	Former Soviet Union	Rest of the World	277730
TYFA-EU	Vegetal products	Export	India	Rest of the World	8011.84
TYFA-EU	Vegetal products	Export	Near and Middle East	Rest of the World	31869.4
TYFA-EU	Vegetal products	Export	North Africa	Rest of the World	2118.11
TYFA-EU	Vegetal products	Export	Oceania	Rest of the World	123147
TYFA-EU	Vegetal products	Export	ECS Africa	Rest of the World	78083.2
TYFA-EU	Vegetal products	Export	Rest of America	Rest of the World	165463
TYFA-EU	Vegetal products	Export	Rest of Asia	Rest of the World	665775
TYFA-EU	Vegetal products	Export	Rest of Europe	Rest of the World	51201.5
TYFA-EU	Vegetal products	Export	EU-27	EU-27	252313
TYFA-EU	Vegetal products	Export	West Africa	Rest of the World	8943.61
TYFA-EU-SUPPLY	Animal products	Import	Brazil, Argentina	Rest of the World	636.126
TYFA-EU-SUPPLY	Animal products	Import	Canada, USA	Rest of the World	7959.95
TYFA-EU-SUPPLY	Animal products	Import	China	Rest of the World	13661
TYFA-EU-SUPPLY	Animal products	Import	Former Soviet Union	Rest of the World	11342.5
TYFA-EU-SUPPLY	Animal products	Import	India	Rest of the World	113.251
TYFA-EU-SUPPLY	Animal products	Import	Near and Middle East	Rest of the World	12717.2
TYFA-EU-SUPPLY	Animal products	Import	North Africa	Rest of the World	6024.31
TYFA-EU-SUPPLY	Animal products	Import	Oceania	Rest of the World	2093.19
TYFA-EU-SUPPLY	Animal products	Import	ECS Africa	Rest of the World	13301.3
TYFA-EU-SUPPLY	Animal products	Import	Rest of America	Rest of the World	14835.9
TYFA-EU-SUPPLY	Animal products	Import	Rest of Asia	Rest of the World	29266
TYFA-EU-SUPPLY	Animal products	Import	Rest of Europe	Rest of the World	10186.6
TYFA-EU-SUPPLY	Animal products	Import	EU-27	EU-27	9175.27
TYFA-EU-SUPPLY	Animal products	Import	West Africa	Rest of the World	44216.1
TYFA-EU-SUPPLY	Vegetal products	Import	Brazil, Argentina	Rest of the World	35295.7
TYFA-EU-SUPPLY	Vegetal products	Import	Canada, USA	Rest of the World	131378
TYFA-EU-SUPPLY	Vegetal products	Import	China	Rest of the World	330274
TYFA-EU-SUPPLY	Vegetal products	Import	Former Soviet Union	Rest of the World	56043.5
TYFA-EU-SUPPLY	Vegetal products	Import	India	Rest of the World	149317
TYFA-EU-SUPPLY	Vegetal products	Import	Near and Middle East	Rest of the World	464855
TYFA-EU-SUPPLY	Vegetal products	Import	North Africa	Rest of the World	411879
TYFA-EU-SUPPLY	Vegetal products	Import	Oceania	Rest of the World	22586
TYFA-EU-SUPPLY	Vegetal products	Import	ECS Africa	Rest of the World	372044
TYFA-EU-SUPPLY	Vegetal products	Import	Rest of America	Rest of the World	317218
TYFA-EU-SUPPLY	Vegetal products	Import	Rest of Asia	Rest of the World	597896
TYFA-EU-SUPPLY	Vegetal products	Import	Rest of Europe	Rest of the World	95288.1
TYFA-EU-SUPPLY	Vegetal products	Import	EU-27	EU-27	551121
TYFA-EU-SUPPLY	Vegetal products	Import	West Africa	Rest of the World	385614
TYFA-EU-SUPPLY	Animal products	Export	Brazil, Argentina	Rest of the World	25182.8
TYFA-EU-SUPPLY	Animal products	Export	Canada, USA	Rest of the World	41229.5
TYFA-EU-SUPPLY	Animal products	Export	China	Rest of the World	15709.3
TYFA-EU-SUPPLY	Animal products	Export	Former Soviet Union	Rest of the World	9282.22
TYFA-EU-SUPPLY	Animal products	Export	India	Rest of the World	2.04301e-06
TYFA-EU-SUPPLY	Animal products	Export	Near and Middle East	Rest of the World	1781.8
TYFA-EU-SUPPLY	Animal products	Export	Oceania	Rest of the World	30487
TYFA-EU-SUPPLY	Animal products	Export	ECS Africa	Rest of the World	1691.92
TYFA-EU-SUPPLY	Animal products	Export	Rest of America	Rest of the World	21496.8
TYFA-EU-SUPPLY	Animal products	Export	Rest of Asia	Rest of the World	12025.1
TYFA-EU-SUPPLY	Animal products	Export	Rest of Europe	Rest of the World	13488.9
TYFA-EU-SUPPLY	Animal products	Export	West Africa	Rest of the World	5.09835e-06
TYFA-EU-SUPPLY	Vegetal products	Export	Brazil, Argentina	Rest of the World	783405
TYFA-EU-SUPPLY	Vegetal products	Export	Canada, USA	Rest of the World	1.13299e+06
TYFA-EU-SUPPLY	Vegetal products	Export	China	Rest of the World	145773
TYFA-EU-SUPPLY	Vegetal products	Export	Former Soviet Union	Rest of the World	375845
TYFA-EU-SUPPLY	Vegetal products	Export	India	Rest of the World	8050.73
TYFA-EU-SUPPLY	Vegetal products	Export	Near and Middle East	Rest of the World	33638.5
TYFA-EU-SUPPLY	Vegetal products	Export	North Africa	Rest of the World	2268.84
TYFA-EU-SUPPLY	Vegetal products	Export	Oceania	Rest of the World	167481
TYFA-EU-SUPPLY	Vegetal products	Export	ECS Africa	Rest of the World	88048.7
TYFA-EU-SUPPLY	Vegetal products	Export	Rest of America	Rest of the World	209409
TYFA-EU-SUPPLY	Vegetal products	Export	Rest of Asia	Rest of the World	887470
TYFA-EU-SUPPLY	Vegetal products	Export	Rest of Europe	Rest of the World	61312.3
TYFA-EU-SUPPLY	Vegetal products	Export	EU-27	EU-27	6699.17
TYFA-EU-SUPPLY	Vegetal products	Export	West Africa	Rest of the World	9381.13

## Sheet: DEP
s	r	Depnet
Initial	Brazil, Argentina	-0.405433
Initial	Canada, USA	-0.265805
Initial	China	0.0851441
Initial	Former Soviet Union	-0.136557
Initial	India	0.00749254
Initial	Near and Middle East	0.273895
Initial	North Africa	0.330331
Initial	Oceania	-0.448141
Initial	ECS Africa	0.0536241
Initial	Rest of America	0.152717
Initial	Rest of Asia	-0.00382193
Initial	Rest of Europe	0.524309
Initial	EU-27	0.105548
Initial	West Africa	0.0441873
Reference	Brazil, Argentina	-0.542567
Reference	Canada, USA	-0.377286
Reference	China	0.0801801
Reference	Former Soviet Union	-0.258594
Reference	India	0.0530905
Reference	Near and Middle East	0.436744
Reference	North Africa	0.73392
Reference	Oceania	-0.690919
Reference	ECS Africa	0.149889
Reference	Rest of America	0.139615
Reference	Rest of Asia	-0.0385957
Reference	Rest of Europe	0.287729
Reference	EU-27	0.0525571
Reference	West Africa	0.197776
TOGETHER	Brazil, Argentina	-0.381017
TOGETHER	Canada, USA	-0.405999
TOGETHER	China	0.0743826
TOGETHER	Former Soviet Union	-0.277614
TOGETHER	India	0.0294734
TOGETHER	Near and Middle East	0.440185
TOGETHER	North Africa	0.423949
TOGETHER	Oceania	-0.877669
TOGETHER	ECS Africa	0.124797
TOGETHER	Rest of America	0.184585
TOGETHER	Rest of Asia	0.0252117
TOGETHER	Rest of Europe	0.46675
TOGETHER	EU-27	-0.142932
TOGETHER	West Africa	0.112914
TYFA-EU	Brazil, Argentina	-0.506528
TYFA-EU	Canada, USA	-0.36117
TYFA-EU	China	0.0785866
TYFA-EU	Former Soviet Union	-0.250875
TYFA-EU	India	0.0534592
TYFA-EU	Near and Middle East	0.435645
TYFA-EU	North Africa	0.731108
TYFA-EU	Oceania	-0.671693
TYFA-EU	ECS Africa	0.150261
TYFA-EU	Rest of America	0.147442
TYFA-EU	Rest of Asia	-0.0160557
TYFA-EU	Rest of Europe	0.300628
TYFA-EU	EU-27	-0.121024
TYFA-EU	West Africa	0.189857
TYFA-EU-SUPPLY	Brazil, Argentina	-0.563317
TYFA-EU-SUPPLY	Canada, USA	-0.421582
TYFA-EU-SUPPLY	China	0.0667651
TYFA-EU-SUPPLY	Former Soviet Union	-0.342826
TYFA-EU-SUPPLY	India	0.0526685
TYFA-EU-SUPPLY	Near and Middle East	0.437695
TYFA-EU-SUPPLY	North Africa	0.758233
TYFA-EU-SUPPLY	Oceania	-0.913465
TYFA-EU-SUPPLY	ECS Africa	0.145611
TYFA-EU-SUPPLY	Rest of America	0.10071
TYFA-EU-SUPPLY	Rest of Asia	-0.0873292
TYFA-EU-SUPPLY	Rest of Europe	0.187931
TYFA-EU-SUPPLY	EU-27	0.355173
TYFA-EU-SUPPLY	West Africa	0.21323

## Sheet: DIET
i	Initial diet UE 27 [kcal/cap/day] (waste included)	Reference diet UE 27 [kcal/cap/day] (waste included)	TYFA diet [kcal/cap/day] (waste included)
Meat	557.104	502.158	158.43
Dairy and Eggs	482.865	434.816	169.151
Aquatic animal products	35.0422	31.257	7.74529
Pulses	30.7214	27.5519	119.651
Maize, Rice and Wheat	1032.53	950.964	680.799
Other cereals	232.037	187.923	466.876
Fruits and vegetables	291.814	257.341	184.535
Roots and Tuber	155.37	137.702	107.115
Sugar and Sweeteners	290.319	406.279	333.314
Vegetable Oils	458.966	599.252	511.002
Other	124.504	150.433	93.3031
Food diets and waste configuration in TYFA and GlobAgri-Agt are slightly different. In the first case, diets are expressed in terms of human caloric intake and waste is a sort of black box representing 20% of EU final food consumption. In the second one, food diets integrate the wastes at the distribution and consumption levels while the variable waste in the balance equations includes all other …
